# Supplementary material for: Stable and efficient n = 2 Ruddlesden–Popper La/Pr nickelates as oxygen electrodes for SOC applications
Source: Royal Society of Chemistry journal article supplement (doi:10.1039/d4ta08062a), 2025-01-01
Supplement: d4ta08062a1.pdf [file d4ta08062a1.pdf]

## Supplementary Information

### Stable and efficient $n = 2$ Ruddlesden-Popper La/Pr nickelates as oxygen electrodes for SOCs applications

Romuald Frugier<sup>a</sup>, Jacinthe Gamon<sup>a</sup>, Sébastien Fourcade<sup>a</sup>, Sonia Buffière<sup>a</sup>, Jean-Marc Bassat<sup>a,\*</sup>

<sup>a</sup> CNRS, Univ. Bordeaux, Bordeaux INP, ICMCB, UMR 5026, F-33600 PESSAC Cedex, France

\* corresponding author : jean-marc.bassat@icmcb.cnrs.fr

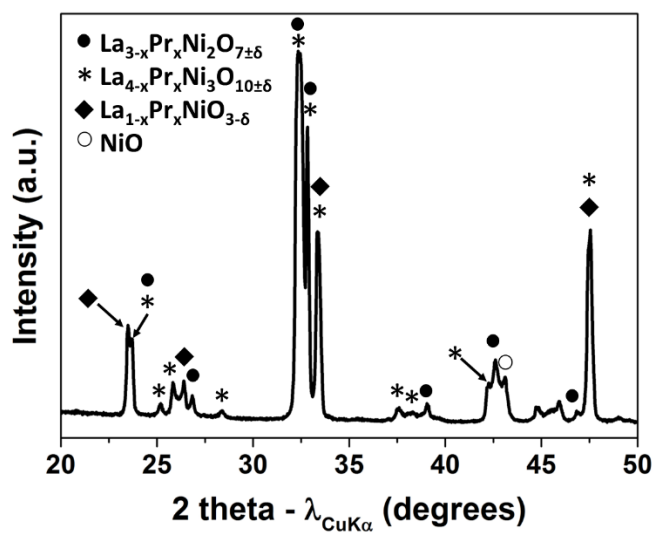

**Fig. S1** Powder XRD diagram for  $\text{La}_{1.125}\text{Pr}_{1.875}\text{Ni}_2\text{O}_{7\pm\delta}$  synthesis under  $\text{O}_2$  gas flow at  $1150\text{ °C}$  for 120 h

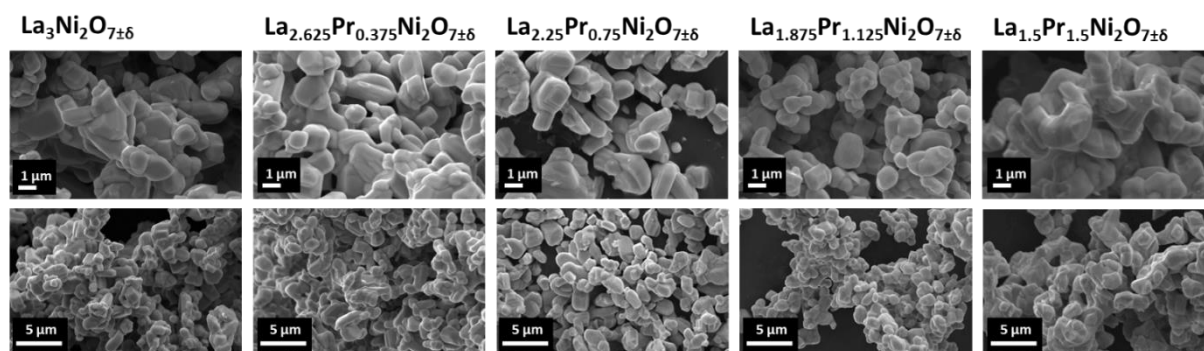

**Fig. S2** SEM pictures of the as-prepared powder of  $\text{La}_{3-x}\text{Pr}_x\text{Ni}_2\text{O}_{7\pm\delta}$  ( $x \leq 1.5$ )

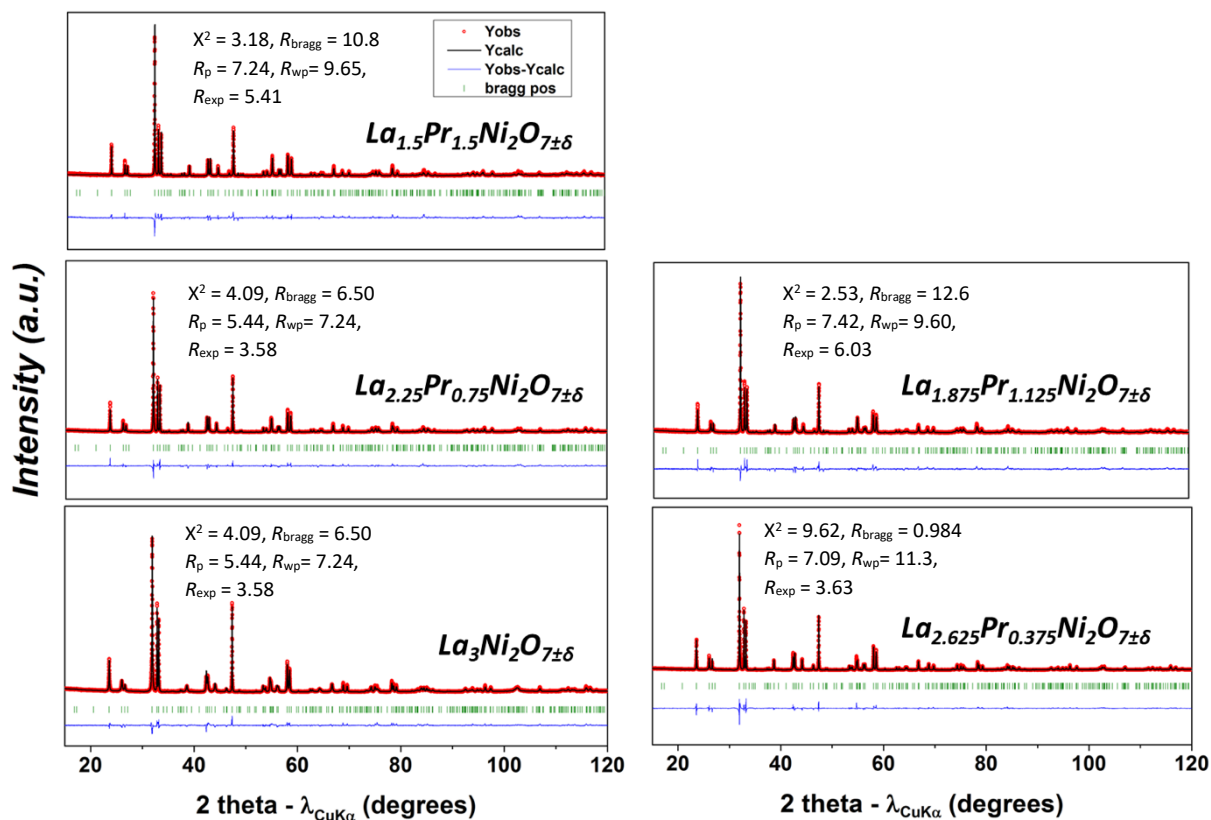

Fig. S3 Rietveld refinement patterns for  $\text{La}_{3-x}\text{Pr}_x\text{Ni}_2\text{O}_{7\pm\delta}$  with  $x = 0, 0.375, 0.75, 1.125, 1.5$ .

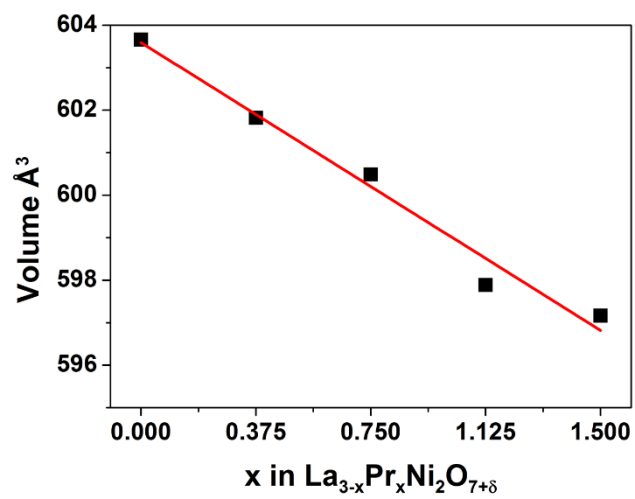

**Fig. S4** Cell volume evolution in function of x in La<sub>3-x</sub>Pr<sub>x</sub>Ni<sub>2</sub>O<sub>7±δ</sub> from Rietveld refinement

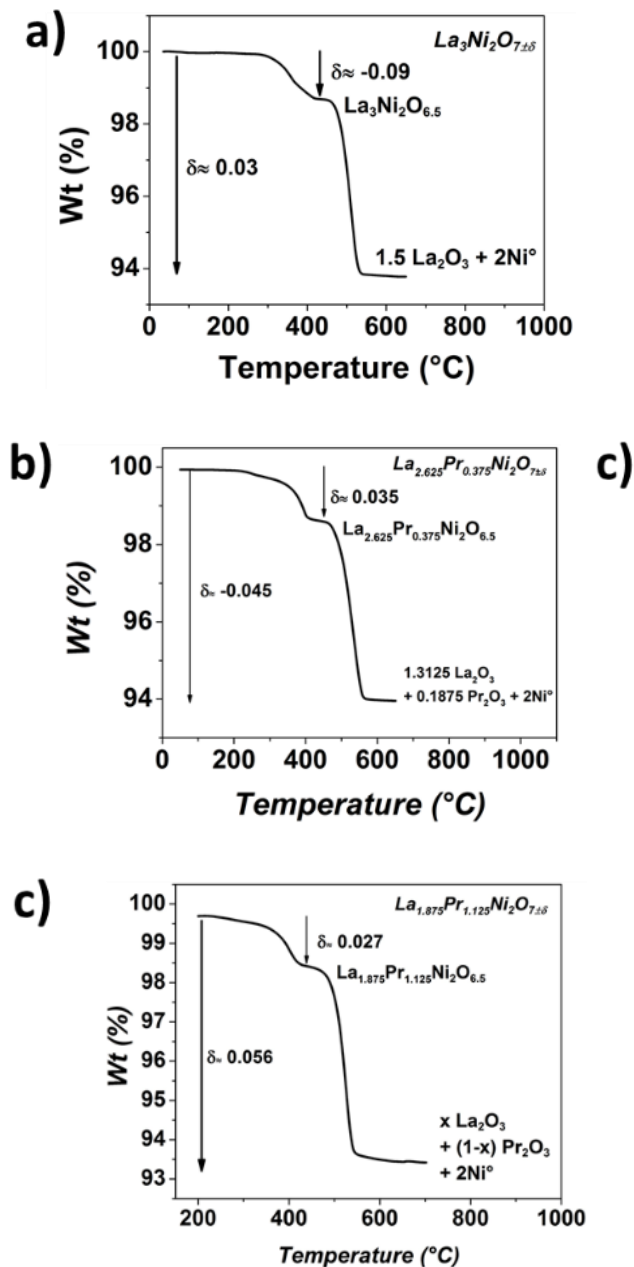

**Fig. S5** TGA plot under Ar-5 %  $\text{H}_2$ , a)  $x = 0$ , b)  $x = 0.375$ , c)  $x = 1.125$

**Table S1** Structural parameters for the different  $n = 2$  Ruddlesden-Popper nickelates determined by Rietveld refinements with the orthorhombic  $Amam$  space group. Standard variations were multiplied by the Berar factor (4.6, 4.0, 3.7, 3.8, 5.2, for  $x = 0, 0.375, 0.75, 1.125, 1.5$  respectively).

Large standard variations were obtained for the isotropic displacement,  $B$ , due to the difficulty of correct modelling of the peak shapes. This was attributed to the presence of structural defects, such as stacking faults, to which RP phases are often subjected. The  $B$  value for atoms of the same type (equatorial oxygen O3 and O4 as well as the two  $Ln$  sites) were constraint to the same value.

**La<sub>3</sub>Ni<sub>2</sub>O<sub>7±6</sub>, a = 5.39744(9) Å, b = 5.44944(2) Å, c = 20.5219(6) Å**

| Atom | X    | Y         | Z          | B (Å)    | Occupancy | Wyckoff site |
|------|------|-----------|------------|----------|-----------|--------------|
| La1  | 0.25 | 0.245(5)  | 0.5        | 0.16(6)  | 1         | 4c           |
| La2  | 0.25 | 0.256(3)  | 0.3189(2)  | 0.16(6)  | 1         | 8g           |
| Ni1  | 0.25 | 0.252(11) | 0.0984(6)  | 0.56(22) | 1         | 8g           |
| O1   | 0.25 | 0.295(28) | 0          | 2(2)     | 1         | 4c           |
| O2   | 0.25 | 0.283(26) | 0.2027(27) | 4(2)     | 1         | 8g           |
| O3   | 0    | 0.5       | 0.1071(36) | 1.5(9)   | 1         | 8e           |
| O4   | 0.5  | 0         | 0.0822(38) | 1.5(9)   | 1         | 8e           |

**La<sub>2.625</sub>Pr<sub>0.375</sub>Ni<sub>2</sub>O<sub>7±6</sub>, a = 5.3871(4) Å, b = 5.45187(4) Å, c = 20.4871(3) Å**

| Atom | X    | Y        | Z           | B (Å)    | Occupancy | Wyckoff site |
|------|------|----------|-------------|----------|-----------|--------------|
| La1  | 0.25 | 0.249(4) | 0.5         | 0.04(4)  | 0.875     | 4c           |
| Pr1  | 0.25 | 0.249(4) | 0.5         | 0.04(4)  | 0.125     | 4c           |
| La2  | 0.25 | 0.255(3) | 0.31924(16) | 0.04(4)  | 0.875     | 8g           |
| Pr2  | 0.25 | 0.255(3) | 0.31924(16) | 0.04(4)  | 0.125     | 8g           |
| Ni1  | 0.25 | 0.254(8) | 0.09841(16) | 0.16(16) | 1         | 8g           |
| O1   | 0.25 | 0.258(8) | 0           | 6(2)     | 1         | 4c           |
| O2   | 0.25 | 0.22(2)  | 0.202(2)    | 1.7(12)  | 1         | 8g           |
| O3   | 0    | 0.5      | 0.1064(24)  | 0.15(16) | 1         | 8e           |
| O4   | 0.5  | 0        | 0.0812(28)  | 0.15(16) | 1         | 8e           |

**La<sub>2.25</sub>Pr<sub>0.75</sub>Ni<sub>2</sub>O<sub>7±6</sub>, a = 5.3841(1) Å, b = 5.4550(1) Å, c = 20.4478(5) Å**

| Atom | X    | Y        | Z         | B (Å)      | Occupancy | Wyckoff site |
|------|------|----------|-----------|------------|-----------|--------------|
| La1  | 0.25 | 0.248(4) | 0.5       | 0.145(41)  | 0.75      | 4c           |
| Pr1  | 0.25 | 0.248(4) | 0.5       | 0.145(41)  | 0.25      | 4c           |
| La2  | 0.25 | 0.251(6) | 0.3203(2) | 0.145(41)  | 0.75      | 8g           |
| Pr2  | 0.25 | 0.251(6) | 0.3203(2) | 0.145(41)  | 0.25      | 8g           |
| Ni1  | 0.25 | 0.250(9) | 0.1088(3) | 0.235(155) | 1         | 8g           |
| O1   | 0.25 | 0.30(1)  | 0         | 4.3(24)    | 1         | 4c           |
| O2   | 0.25 | 0.23(2)  | 0.212(2)  | 3(1)       | 1         | 8g           |
| O3   | 0    | 0.5      | 0.106(3)  | 1.0(7)     | 1         | 8e           |
| O4   | 0.5  | 0        | 0.069(3)  | 1.0(7)     | 1         | 8e           |

**La<sub>1.875</sub>Pr<sub>1.125</sub>Ni<sub>2</sub>O<sub>7±6</sub>, a = 5.3774(1) Å, b = 5.4551(1) Å, c = 20.3886(6) Å**

| Atom | X    | Y          | Z         | B (Å)     | Occupancy | Wyckoff site |
|------|------|------------|-----------|-----------|-----------|--------------|
| La1  | 0.25 | 0.2502(45) | 0.5       | 0.804(15) | 0.375     | 4c           |
| Pr1  | 0.25 | 0.2502(45) | 0.5       | 0.804(15) | 0.625     | 4c           |
| La2  | 0.25 | 0.255(3)   | 0.3197(3) | 0.23(8)   | 0.375     | 8g           |
| Pr2  | 0.25 | 0.255(3)   | 0.3197(3) | 0.23(8)   | 0.625     | 8g           |
| Ni1  | 0.25 | 0.257(4)   | 0.1098(4) | 0.41(21)  | 1         | 8g           |
| O1   | 0.25 | 0.324(17)  | 0         | 2(2)      | 1         | 4c           |
| O2   | 0.25 | 0.22(18)   | 0.215(3)  | 2.2(12)   | 1         | 8g           |
| O3   | 0    | 0.5        | 0.108(3)  | 2.0(12)   | 1         | 8e           |
| O4   | 0.5  | 0          | 0.073(3)  | 2.0(12)   | 1         | 8e           |

**La<sub>1.5</sub>Pr<sub>1.5</sub>Ni<sub>2</sub>O<sub>7±6</sub>, a = 5.3718(6) Å, b = 5.4594(5) Å, c = 20.362(3) Å**

| Atom | X    | Y          | Z         | B (Å)    | Occupancy | Wyckoff site |
|------|------|------------|-----------|----------|-----------|--------------|
| La1  | 0.25 | 0.25(1)    | 0         | 0.73(5)  | 0.5       | 4c           |
| Pr1  | 0.25 | 0.25(1)    | 0.5       | 0.73(5)  | 0.5       | 4c           |
| La2  | 0.25 | 0.255(5)   | 0.319(25) | 0.73(5)  | 0.5       | 8g           |
| Pr2  | 0.25 | 0.255(5)   | 0.319(25) | 0.73(5)  | 0.5       | 8g           |
| Ni1  | 0.25 | 0.25(2000) | 0.0969(5) | 1.23(35) | 1         | 8g           |
| O1   | 0.25 | 0.30(3)    | 0         | 1.4(30)  | 1         | 4c           |
| O2   | 0.25 | 0.20(2)    | 0.204(3)  | 1.5(20)  | 1         | 8g           |
| O3   | 0    | 0.5        | 0.108(4)  | 0.5(10)  | 1         | 8e           |
| O4   | 0.5  | 0          | 0.085(5)  | 0.5(10)  | 1         | 8e           |

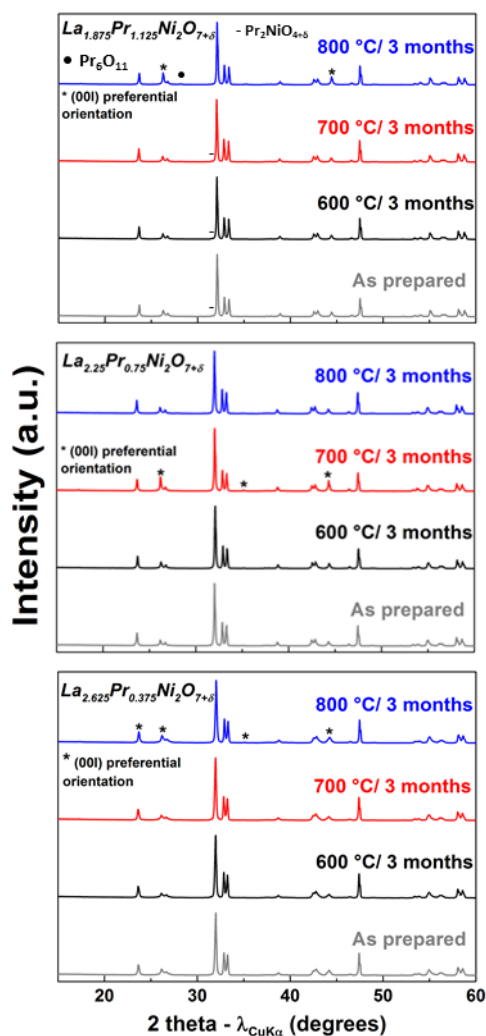

**Fig. S6** Diffractograms of  $\text{La}_{2.625}\text{Pr}_{0.375}\text{Ni}_2\text{O}_{7\pm\delta}$ ,  $\text{La}_{2.25}\text{Pr}_{0.75}\text{Ni}_2\text{O}_{7\pm\delta}$  and  $\text{La}_{1.875}\text{Pr}_{1.125}\text{Ni}_2\text{O}_{7\pm\delta}$  aged at 600, 700 and 800 °C for 3 months and as-prepared. \* These (00l) reflections are subject to preferential orientation. The presence of  $\text{Pr}_6\text{O}_{11}$  in  $\text{La}_{1.875}\text{Pr}_{1.125}\text{Ni}_2\text{O}_{7\pm\delta}$  aged at 800 °C for 3 months comes from the decomposition of the small  $\text{Pr}_2\text{NiO}_{4\pm\delta}$  impurity obtained after synthesis due to a slight deviation from the exact stoichiometry when weighting the precursors

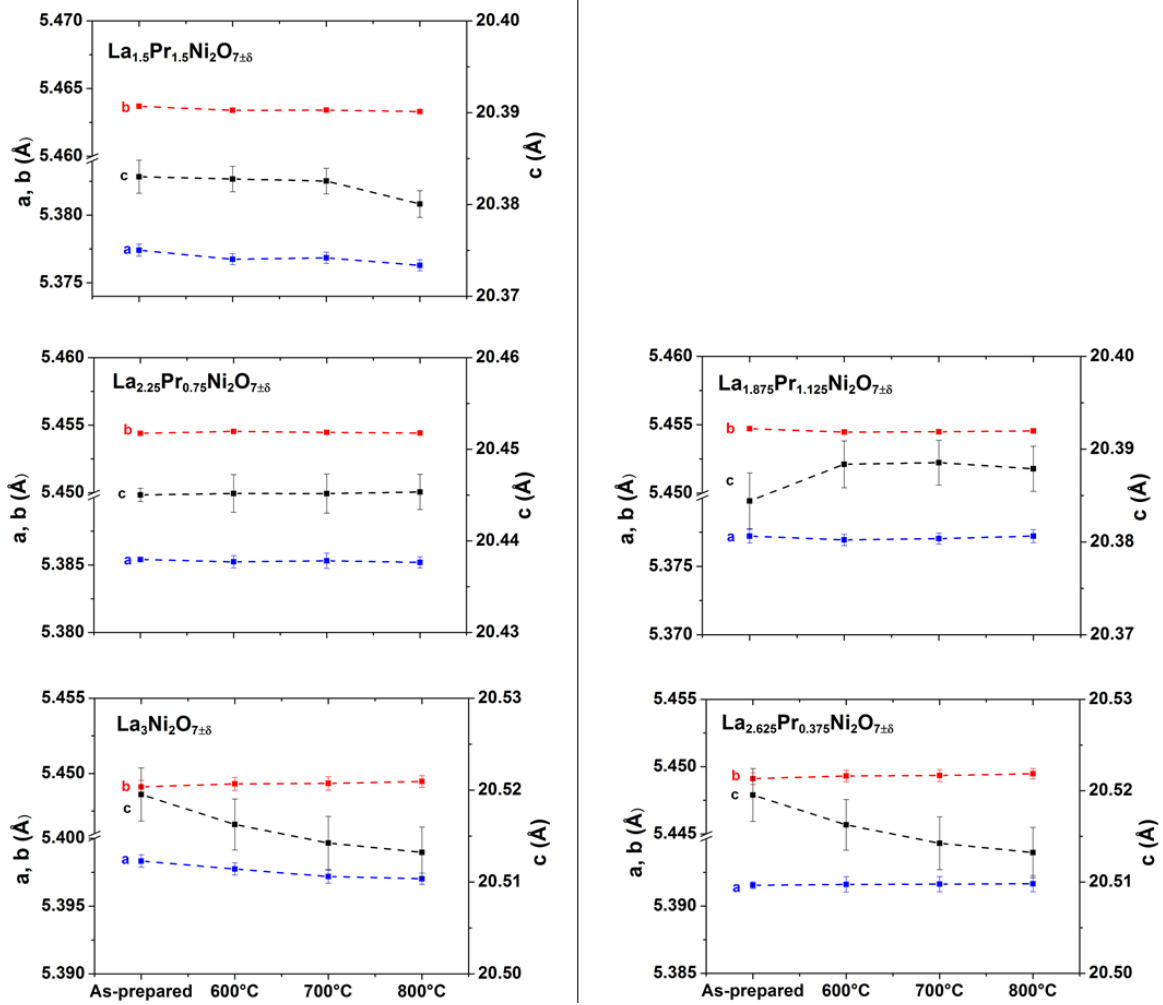

**Fig. S7** Cell parameters obtained through profile matching refinement against the data of  $\text{La}_{3-x}\text{Pr}_x\text{Ni}_2\text{O}_{7\pm\delta}$  aged at 600, 700 and 800°C for 1 month and as-prepared

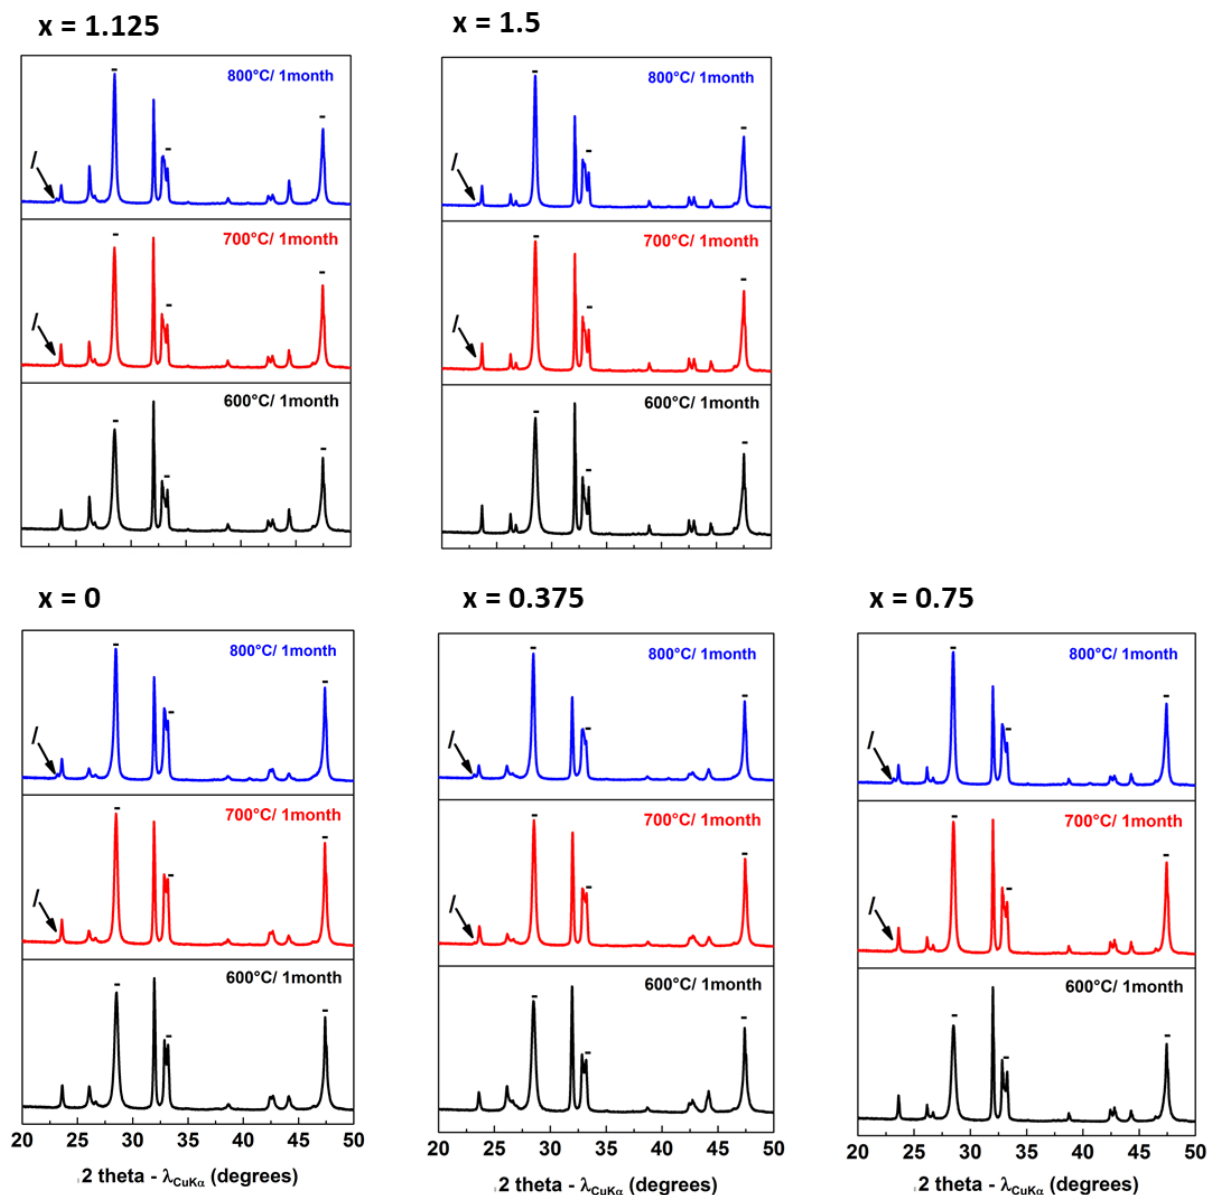

**Fig S8** Diffractogram (20-60°) of the aged GDC/ La<sub>3</sub>Ni<sub>2</sub>O<sub>7±δ</sub> mixture at 800 °C for 1 month. / corresponds to the La<sub>1-x</sub>Pr<sub>x</sub>NiO<sub>3-δ</sub> perovskite phase, - to GDC and unlabelled peaks the La<sub>3-x</sub>Pr<sub>x</sub>Ni<sub>2</sub>O<sub>7±δ</sub> phase



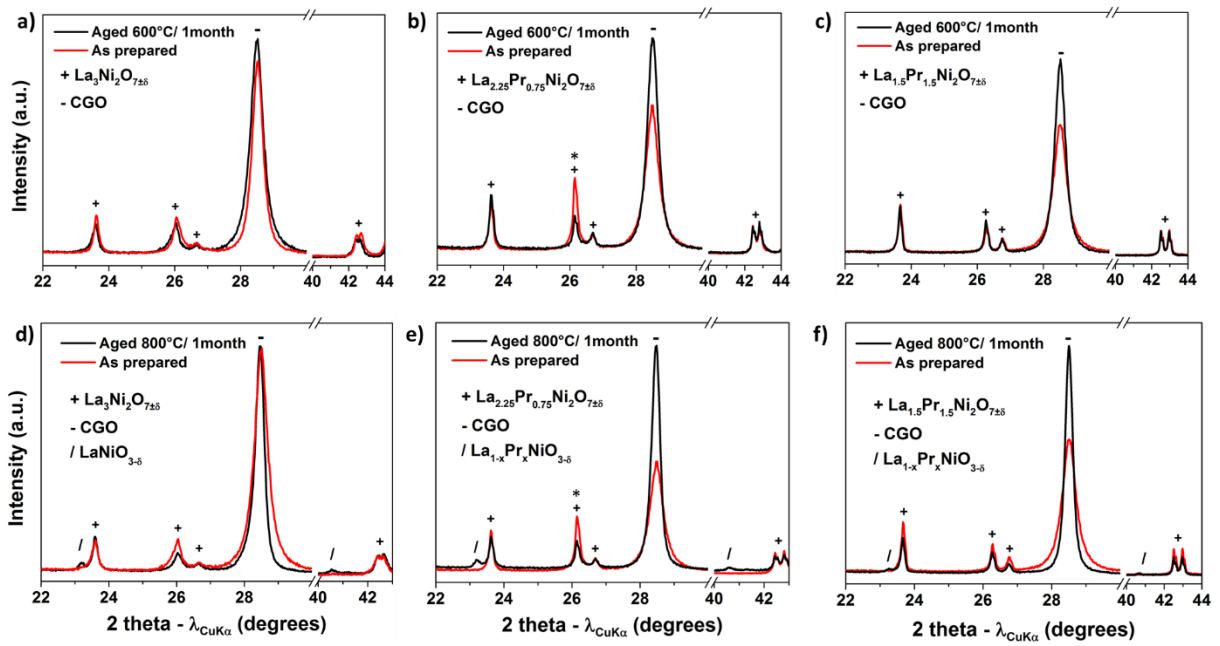

**Fig. S9** Powder XRD diagrams (zooms) of the nickelate and GDC mixture as-prepared and after ageing at 600 °C and 800 °C for 1 month for (a, d)  $\text{La}_3\text{Ni}_2\text{O}_{7\pm\delta}$ , (b, e)  $\text{La}_{2.25}\text{Pr}_{0.75}\text{Ni}_2\text{O}_{7\pm\delta}$  and, (c, f)  $\text{La}_{1.5}\text{Pr}_{1.5}\text{Ni}_2\text{O}_{7\pm\delta}$ . \* These (00/) reflections are subject to preferential orientation

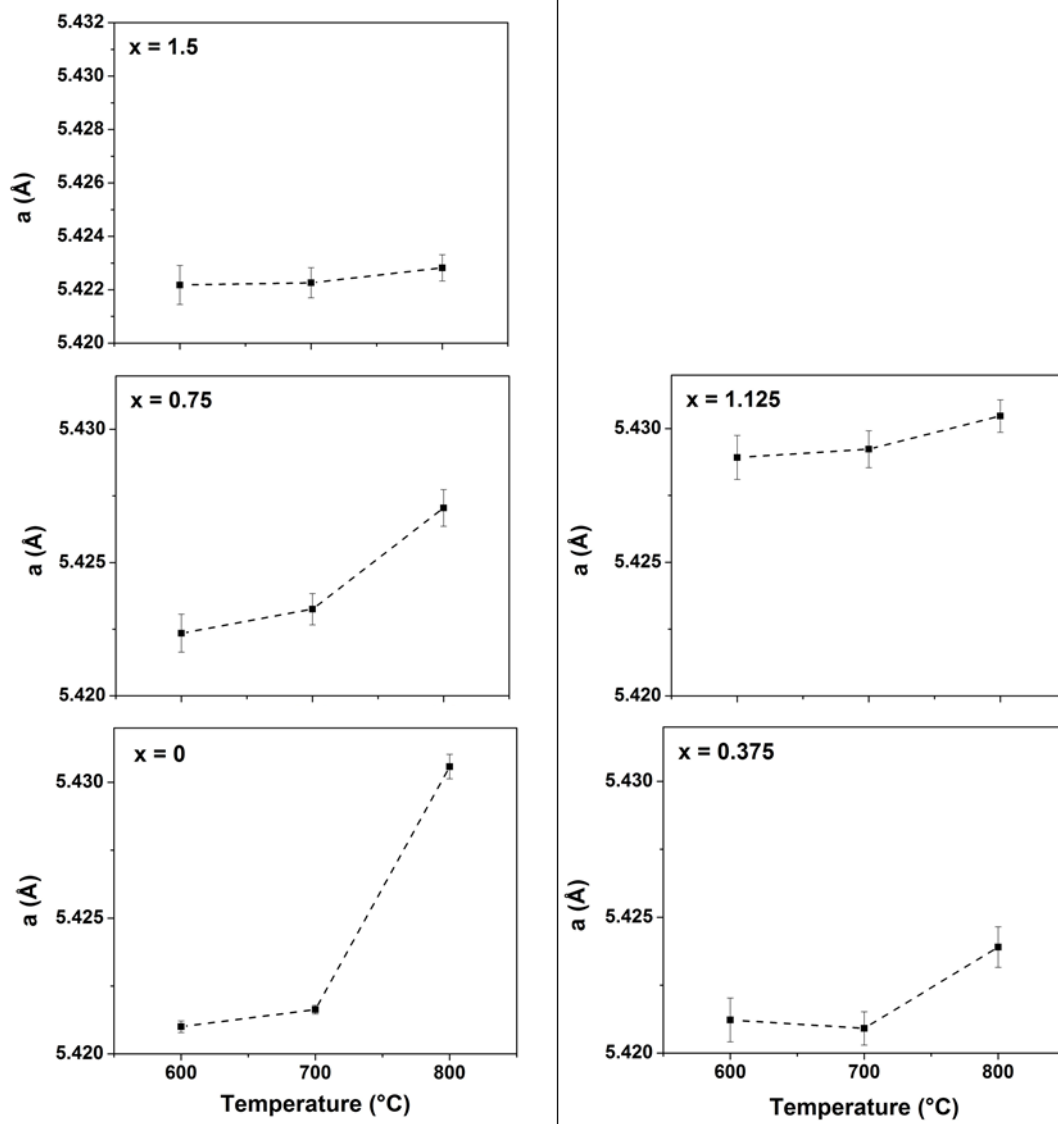

**Fig. S10** Cell parameters of the GDC phase obtained through profile matching refinement against the XRD data of GDC aged in presence of  $\text{La}_{3-x}\text{Pr}_x\text{Ni}_2\text{O}_{7\pm\delta}$  at 600, 700 and 800 °C for 1 month and as-prepared.

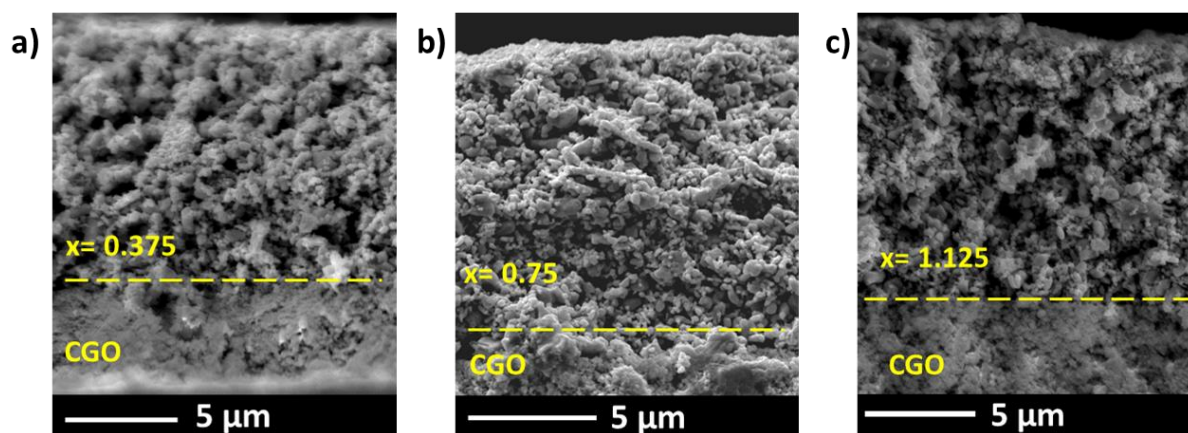

**Fig. S11** SEM images of the symmetrical cells of (a)  $\text{La}_{2.625}\text{Pr}_{0.375}\text{Ni}_2\text{O}_{7\pm\delta}$ , (b)  $\text{La}_{2.25}\text{Pr}_{0.75}\text{Ni}_2\text{O}_{7\pm\delta}$  and, (c)  $\text{La}_{1.875}\text{Pr}_{1.125}\text{Ni}_2\text{O}_{7\pm\delta}$ . All pictures were taken with a magnification of 5000.

**Table S2** Parameters used to fit the Nyquist obtained at 600°C. Standard uncertainties are those given by the fitting which are largely underestimated.

|                                     | $\text{La}_3\text{Ni}_2\text{O}_{7\pm\delta}$ | $\text{La}_{2.625}\text{Pr}_{0.375}\text{Ni}_2\text{O}_{7\pm\delta}$ | $\text{La}_{2.25}\text{Pr}_{0.75}\text{Ni}_2\text{O}_{7\pm\delta}$ | $\text{La}_{1.875}\text{Pr}_{1.125}\text{Ni}_2\text{O}_{7\pm\delta}$ | $\text{La}_{1.5}\text{Pr}_{1.5}\text{Ni}_2\text{O}_{7\pm\delta}$ |
|-------------------------------------|-----------------------------------------------|----------------------------------------------------------------------|--------------------------------------------------------------------|----------------------------------------------------------------------|------------------------------------------------------------------|
| $R_s$ ( $\Omega\cdot\text{cm}^2$ )  | $2.829 \pm 0.001$                             | $4.538 \pm 0.007$                                                    | $2.8503 \pm 0.0005$                                                | $4.7941 \pm 0.0002$                                                  | $3.5412 \pm 0.0004$                                              |
| $R_1$ ( $\Omega\cdot\text{cm}^2$ )  | $1.760 \pm 0.002$                             | $0.242 \pm 0.001$                                                    | $0.2389 \pm 0.0007$                                                | $0.2238 \pm 0.0002$                                                  | $0.4430 \pm 0.0005$                                              |
| $Q_1$ ( $\text{S}\cdot\text{s}^n$ ) | $0.001331 \pm 0.000003$                       | $0.000232 \pm 0.000001$                                              | $0.0067 \pm 0.0001$                                                | $0.0188 \pm 0.0001$                                                  | $0.00470 \pm 0.00002$                                            |
| $n_1$                               | $0.5638 \pm 0.0002$                           | $0.947 \pm 0.002$                                                    | $0.627 \pm 0.001$                                                  | $0.5525 \pm 0.0004$                                                  | $0.8357 \pm 0.0006$                                              |
| $R_2$ ( $\Omega\cdot\text{cm}^2$ )  | $2.043 \pm 0.002$                             | $1.380 \pm 0.002$                                                    | $1.220 \pm 0.001$                                                  | $0.4583 \pm 0.0002$                                                  |                                                                  |
| $Q_2$ ( $\text{S}\cdot\text{s}^n$ ) | $0.001488 \pm 0.000004$                       | $0.00142 \pm 0.00001$                                                | $0.00229 \pm 0.00001$                                              | $0.001155 \pm 0.000002$                                              |                                                                  |
| $n_2$                               | $0.7803 \pm 0.0004$                           | $0.7556 \pm 0.0004$                                                  | $0.8098 \pm 0.0003$                                                | $0.9617 \pm 0.0002$                                                  |                                                                  |

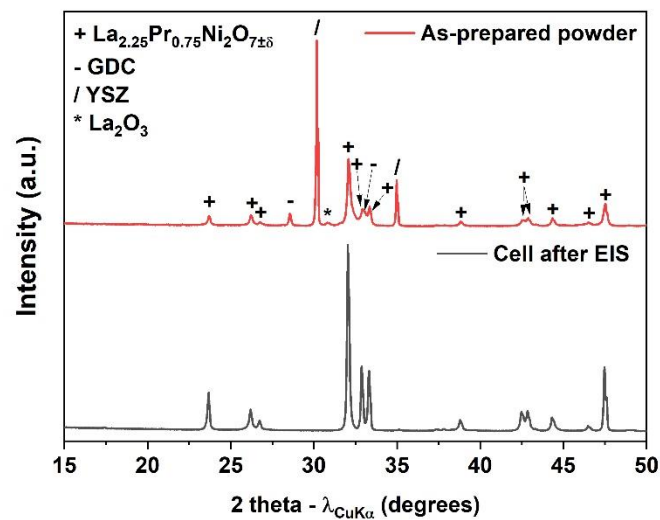

**Fig. S12** XRD diagram of the as-prepared  $\text{La}_{2.25}\text{Pr}_{0.75}\text{Ni}_2\text{O}_{7\pm\delta}$ // GDC// YSZ symmetrical cell, co-sintered at 950 °C for 2 h.

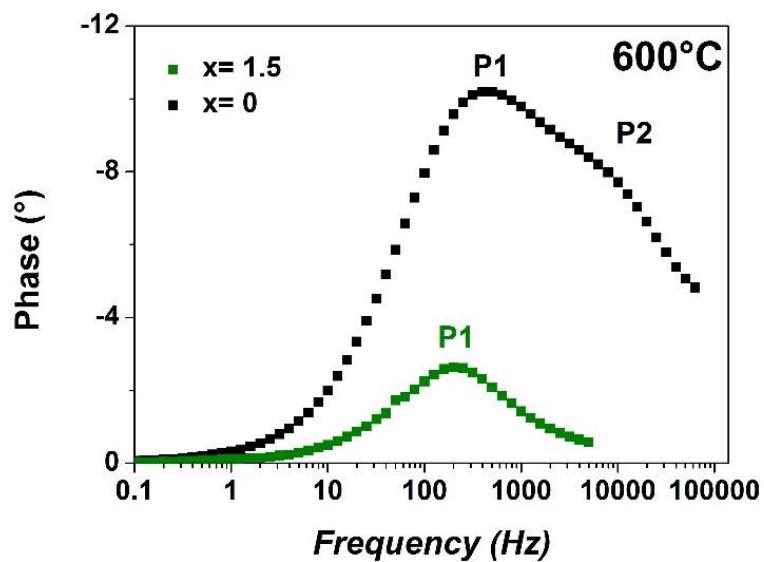

**Fig. S13** Bode plot of  $\text{La}_3\text{Ni}_2\text{O}_{7\pm\delta}$  and  $\text{La}_{1.5}\text{Pr}_{1.5}\text{Ni}_2\text{O}_{7\pm\delta}$  obtained at 600°C.
